# Supplementary material
Source: PubMed Central journal article supplement (PMC3174856)

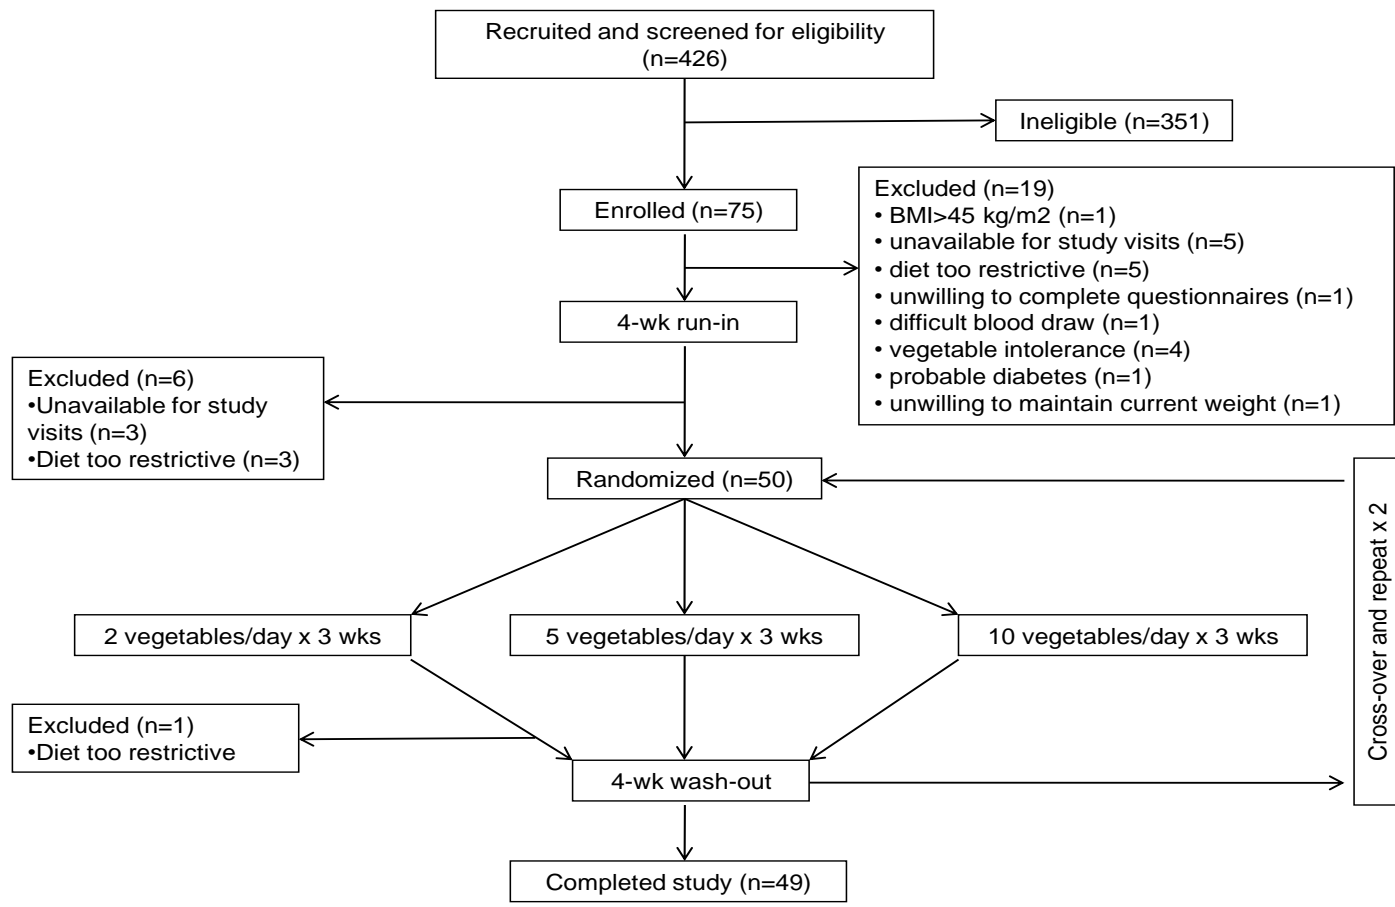

**Supplemental Figure 1. Trial CONSORT diagram**

Supplement: supp_jn.111.139659_nut_139659_SF1.pdf [file supp_jn.111.139659_nut_139659_SF1.pdf]
